# Supplementary material for: Copy Number and Prevalence of Porcine Endogenous Retroviruses (PERVs) in German Wild Boars
Source: PubMed Central journal article supplement (PMC7232352; doi:10.3390/v12040419), 2020-04-08
Supplement: viruses-12-00419-s001.pdf [file viruses-12-00419-s001.pdf]

A

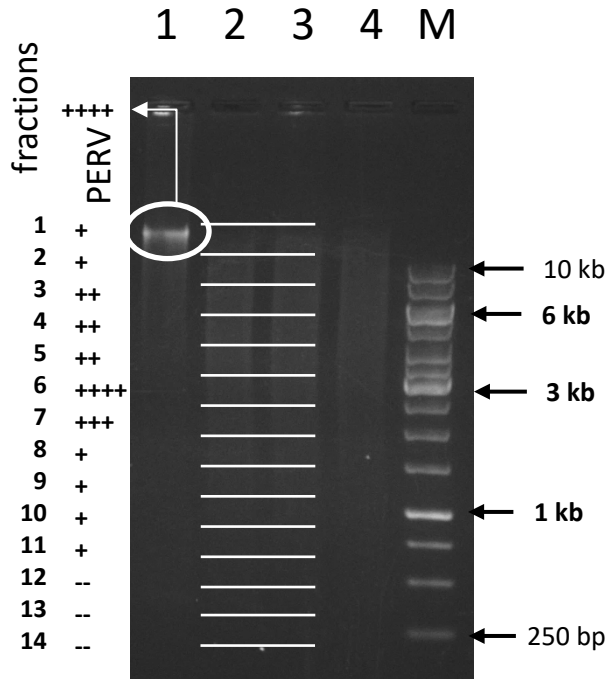

B

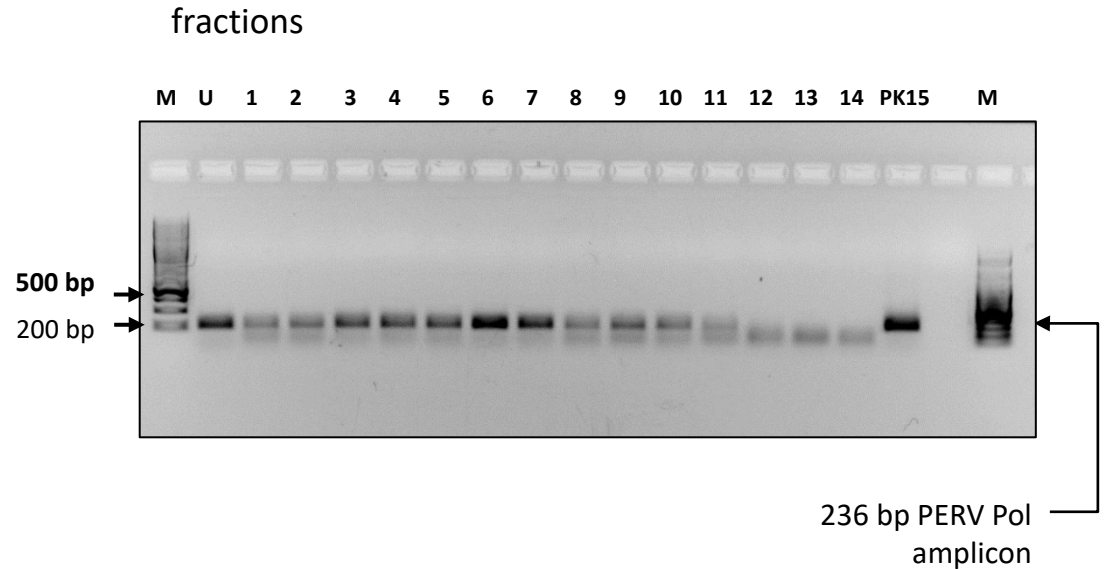

**Supplemental Figure 1, A**, Agarose gel (0.8%) electrophoresis (70 V, 2 hours) of purified DNA from a wild boar, either untreated (lane 1) or treated with EcoRI (fast digest, Thermo Fisher) for 90 min (lane 2, 3). The marker (M) is the GeneRuler 1 kb DNA ladder (Thermo Fisher). After electrophoresis the gel was cut in fractions (1 to 14), from each fraction the DNA was isolated and tested in a PCR using the PERVpol primers. PERV positive (+, ++, +++) and negative fractions (-) are indicated. In parallel the high-molecular DNA from the untreated DNA (ellipse in lane 1, A) was isolated and analysed in the PCR using PERVpol primers. The result was ++++. **B**, Results of the PCR testing for PERV using the DNA eluted from gel fractions 1 to 14 and untreated sample (U) as shown in figure A, M, Marker; PK15, positive control, DNA from PK15 cells, the length of the amplicon (236 bp) is marked with an arrow.

A

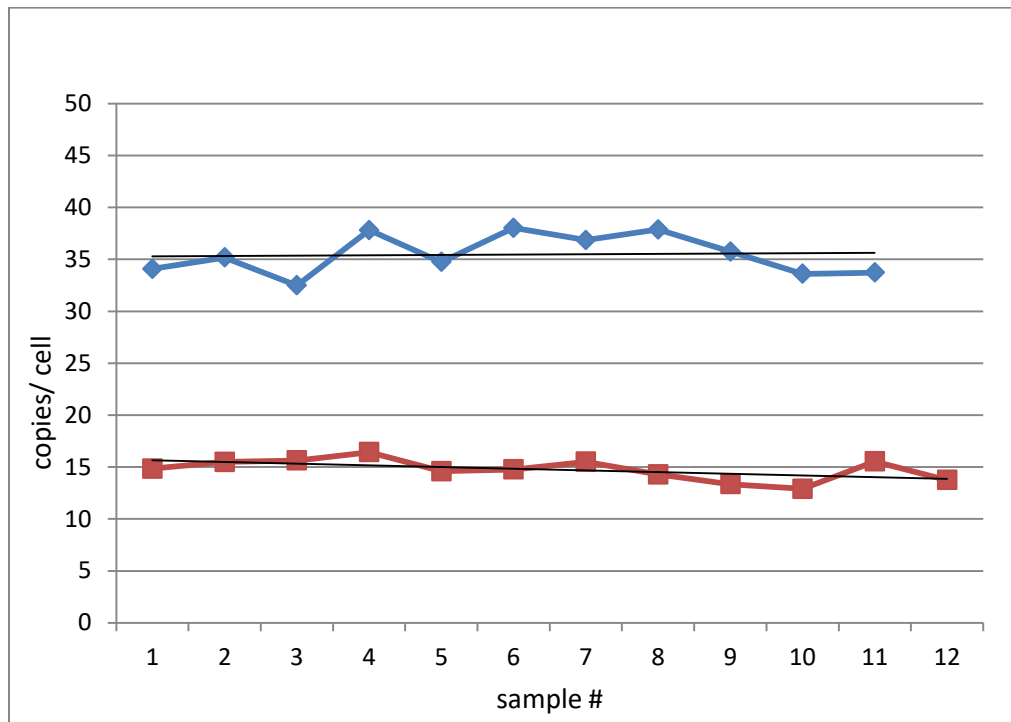

B

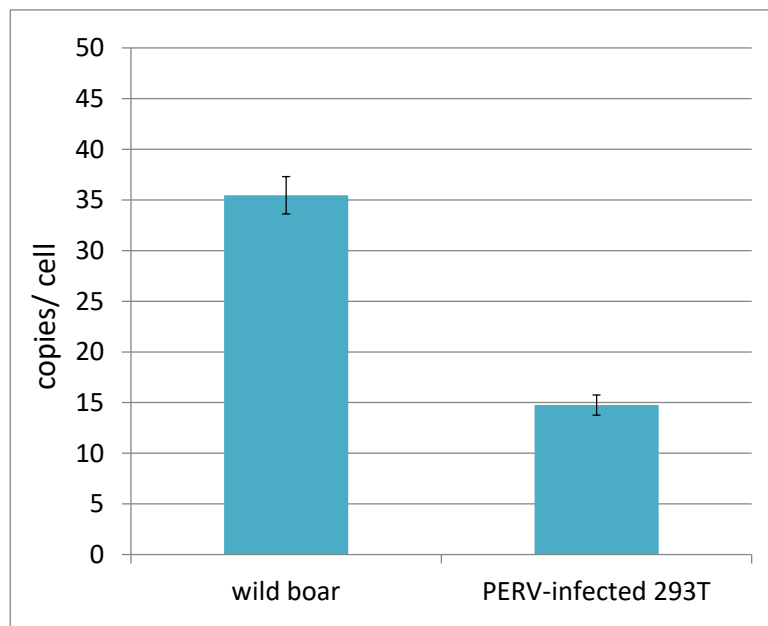

**Supplemental Figure 2.** Validation of the ddPCR. A, Eleven or 12 DNA samples, respectively, from the same DNA batch were used to determine the PERV copy number in wild boars (blue line) and PERV-infected 293 cells (red line) using ddPCR. B, Summary of the experiment shown in A, showing the mean value of the PERV copy number of the samples. In the wild boar samples  $35.46 \pm 1.85$  copies/cell were detected, whereas the PERV-infected 293T samples showed  $14.76 \pm 1.0$  copies/ cell.

**Supplemental Table 1.** Primers and probes used for the detection of PERV.

| Primer, probe     | Sequence                                        | Accession number | Position (nt-nt) | Reference                    |
|-------------------|-------------------------------------------------|------------------|------------------|------------------------------|
| PERV EnvA forward | 5'-TGGAAAGATTGGCAACAGCG -3'                     | Y12238           | 742-761          | Tissier et al.,<br>1997 [45] |
| PERV EnvA reverse | 5'-AGTGATGTTAGGCTCAGTGG -3'                     |                  | 1101-1082        |                              |
| PERV EnvB forward | 5'-TTCTCCTTTGTCAATTCCGG -3'                     | Y12239           | 1376-1395        |                              |
| PERV EnvB reverse | 5'-TACTTTATCGGGTCCCCTG -3'                      |                  | 1639-1620        |                              |
| PERV EnvC forward | 5'-CCCCAACCCAAGGACCAG-3'                        |                  | 9601-9618        | Kaulitz et al.,<br>2011 [15] |
| PERV EnvC reverse | 5'-AAGTTTTGCCCCATTCTAGT-3'                      | AM229312         | 9692-9672        |                              |
| PERV EnvC probe   | 5'-[6FAM] CTCTAACATAACTTCTGGATCAGACCC [BHQ1]-3' |                  | 9626-9652        |                              |
| PERV pol forward  | 5'- CGACTGCCCAAGGGTTCAA-3'                      | HM159246         | 3568-3587        | Yang et al.,<br>2015 [8]     |
| PERV pol reverse  | 5'-TCTCTCCTGCAAATCTGGGCC-3'                     |                  | 3803-3783        |                              |
| PERV pol probe    | 5'-[6FAM]CACGTACTGGAGGAGGGTCACCTG[BHQ1]-3'      |                  | 3678-3655        |                              |
| pactin forward    | 5'-TAACCGATCCTTTCAAGCATT-3'                     |                  |                  |                              |
| pactin reverse    | 5'-TGGTTTCAAAGCTTGCATCATA-3'                    |                  |                  |                              |
| pactin probe      | 5'-[HEX]CGTGGGGATGCTTCCTGAGAAAG[BHQ1]-3'        |                  |                  |                              |
| pGAPDH forward    | 5'- TTCACTCCGACCTTCACCAT -3'                    | 396823           | 3951-3970        |                              |
| pGAPDH reverse    | 5'- CCGCGATCTAATGTTCTCTTTC -3'                  |                  | 4022-4001        |                              |
| pGAPDH probe      | 5'-[HEX]CAGCCGCGTCCCTGAGACAC[BHQ1]-3'           |                  | 3991-3972        |                              |

Reference 45: Le Tissier, P.; Stoye, J.P.; Takeuchi, Y.; Patience, C.; Weiss, R.A. Two sets of human-tropic pig retrovirus. *Nature* 1997, 389, 681–682.
